# Supplementary material for: Thread embedding acupuncture for musculoskeletal pain: a systematic review and meta-analysis protocol
Source: PubMed Central journal article supplement — BMJ Open. 2018 Jan 26;8(1):e015461. doi: 10.1136/bmjopen-2016-015461 (PMC5829818; doi:10.1136/bmjopen-2016-015461), 2018-01-26
Supplement: bmjopen-2016-015461supp002.pdf [file bmjopen-2016-015461supp002.pdf]

## Online Resource 1 Search strategies

### *MEDLINE (Ovid Medline)*

|                     |                                                                                                 |
|---------------------|-------------------------------------------------------------------------------------------------|
| <b>Patient</b>      | 1. exp Pain                                                                                     |
|                     | 2. exp Pain Management                                                                          |
|                     | 3. exp Analgesia                                                                                |
|                     | 4. (pain* or analgesi* or ache* or suffering* or discomfort).mp.                                |
|                     | 5. 1 or 2 or 3 or 4                                                                             |
| <b>Intervention</b> | 6. ((catgut or thread or needle or acupunctur* or acupoint*) adj3 (implantation or embed*)).mp. |
|                     | 7. embedding therapy.mp.                                                                        |
|                     | 8. 6 or 7                                                                                       |
|                     | 9. 5 and 8                                                                                      |

### *Chinese Database (CNKI)*

|                                           |                     |
|-------------------------------------------|---------------------|
| <b>Intervention (meaning: TEA)</b>        | 1. 埋线 OR 埋针 OR 埋藏疗法 |
| <b>Patient (meaning: pain)</b>            | 2. 痛                |
| <b>Study design (meaning: randomised)</b> | 3. 随机               |
|                                           | 4. 1 AND 2 AND 3    |

### *Korean Databases (KAMJE, KMBASE, KISS, NDSL, DBpia, KNADL, OASIS and KTKP)*

|                                    |                     |
|------------------------------------|---------------------|
| <b>Intervention (meaning: TEA)</b> | 1. 매선 OR 매침 OR 매장요법 |
| <b>Patient (meaning: pain)</b>     | 2. 통증 OR 진통         |
|                                    | 3. 1 AND 2          |

URLs of databases

|                      |                                                                                                                                                           |
|----------------------|-----------------------------------------------------------------------------------------------------------------------------------------------------------|
| MEDLINE              | <a href="http://gateway.ovid.com/autologin">http://gateway.ovid.com/autologin</a>                                                                         |
| CENTRAL              | <a href="http://www.thecochranelibrary.com/">http://www.thecochranelibrary.com/</a>                                                                       |
| EMBASE               | <a href="https://www.embase.com">https://www.embase.com</a>                                                                                               |
| CINAHL               | <a href="http://search.ebscohost.com/login.asp?profile=ehost&amp;defaultdb=rzh">http://search.ebscohost.com/login.asp?profile=ehost&amp;defaultdb=rzh</a> |
| AMED                 | <a href="http://gateway.ovid.com/autologin">http://gateway.ovid.com/autologin</a>                                                                         |
| CNKI                 | <a href="http://www.cnki.net">www.cnki.net</a>                                                                                                            |
| VIP                  | <a href="http://www.cqvip.com">www.cqvip.com</a>                                                                                                          |
| The Wanfang database | <a href="http://www.wanfangdata.com">www.wanfangdata.com</a>                                                                                              |
| KMBASE               | <a href="http://kmbase.medic.or.kr/">http://kmbase.medic.or.kr/</a>                                                                                       |
| KAMJE                | <a href="https://kamje.or.kr/">https://kamje.or.kr/</a>                                                                                                   |
| KISS                 | <a href="http://kiss.kstudy.com/">http://kiss.kstudy.com/</a>                                                                                             |
| KNADL                | <a href="http://www.nanet.go.kr/">http://www.nanet.go.kr/</a>                                                                                             |
| NDSL                 | <a href="http://www.ndsl.kr/index.do">http://www.ndsl.kr/index.do</a>                                                                                     |
| OASIS                | <a href="https://oasis.kiom.re.kr/">https://oasis.kiom.re.kr/</a>                                                                                         |
| DBpia                | <a href="http://www.dbpia.co.kr/">http://www.dbpia.co.kr/</a>                                                                                             |
| KTKP                 | <a href="http://www.koreantk.com">http://www.koreantk.com</a>                                                                                             |
| ICTRP                | <a href="http://apps.who.int/trialsearch/">http://apps.who.int/trialsearch/</a>                                                                           |
